# Supplementary material
Source: ML conference proceedings conference paper supplement (https://openreview.net/forum?id=AoRIT2Uzfg)
Supplement: supplementary_material [file attachment]

# DRMGUARD: DEFENDING DEEP REGRESSION MODELS AGAINST BACKDOOR ATTACKS

**Anonymous authors**

Paper under double-blind review

## ABSTRACT

Deep regression models are used in a wide variety of safety-critical applications, but are vulnerable to backdoor attacks. Although many defenses have been proposed for classification models, they are ineffective as they do not consider the uniqueness of regression models. First, the outputs of regression models are continuous values instead of discretized labels. Thus, the potential infected target of a backdoored regression model has infinite possibilities, which makes it impossible to be determined by existing defenses. Second, the backdoor behavior of backdoored deep regression models is triggered by the activation values of all the neurons in the feature space, which makes it difficult to be detected and mitigated using existing defenses. To resolve these problems, we propose DRMGuard, the first defense to identify if a deep regression model in the image domain is backdoored or not. DRMGuard formulates the optimization problem for reverse engineering based on the unique output-space and feature-space characteristics of backdoored deep regression models. We conduct extensive evaluations on two regression tasks and four datasets. The results show that DRMGuard can consistently defend against various backdoor attacks. We also generalize four state-of-the-art defenses designed for classifiers to regression models, and compare DRMGuard with them. The results show that DRMGuard significantly outperforms all those defenses. The code will be open-sourced upon paper acceptance.

## 1 INTRODUCTION

Regression techniques are widely used to solve tasks where the goal is to predict continuous values. Unsurprisingly, similar to their classification counterparts, regression techniques have been revolutionized with deep learning and have achieved the state-of-the-art result in many real-world applications. Examples such as gaze estimation (Zhang et al., 2017b; 2019), head pose estimation (Borghi et al., 2017; Kuhnke & Ostermann, 2019), and facial landmark detection (Sun et al., 2013; Wu & Ji, 2019), among many others (Lathuilière et al., 2019). Unfortunately, deep regression models (DRM) inherited the vulnerabilities of deep neural networks (Gu et al., 2019; Liu et al., 2018b; Nguyen & Tran, 2021; 2020; Turner et al., 2019) and did not escape from the threat of backdoor attacks. Existing work (Sun et al., 2022) shows that an attacker can inject a backdoor trigger into a DRM such that it outputs an attacker-chosen target vector for any input stamped with an attacker-chosen backdoor trigger, while its predictions for clean inputs are unaffected. Therefore, given the wide adoption of DRM in many safety-critical applications such as driver attention monitoring (Abuel-samid, 2020; Berman, 2020), navigation of autonomous vehicles (Zeisl et al., 2015), and pedestrian attention monitoring (Raza et al., 2018; Schulz & Stiefelhagen, 2012), backdoor attacks raise severe safety concerns about the trustworthiness and robustness of DRMs.

Existing solutions to defend deep classification model (DCM) against backdoor attacks can be divided into *data-level* (Chen et al., 2018; Guo et al., 2023) and *model-level defenses* (Liu et al., 2019; Wang et al., 2019; 2022b). Data-level defenses aim to detect backdoored training or testing data, while model-level defenses aim to detect a potentially backdoored model and unlearn the backdoor behaviors. As we will discuss in Section 2, our work focuses on model-level defenses, as they are more realistic and do not assume the defender has access to the backdoored training or testing data.

However, existing model-level defenses (Wang et al., 2022b; 2019; Wu & Wang, 2021) are designed for DCMs. Our experiments show that they are ineffective when generalized and applied to DRMs

that are considered in this work. There are two underlying causes. First, distinct from DCMs (Wang et al., 2017) for which the output space is discretized into a few class labels, the output space of DRMs is continuous. Thus, it is infeasible (if not impossible) to enumerate and analyze all the potential target vectors using existing defenses designed for DCMs to determine the infected target (Wang et al., 2019) or the compromised neurons (Liu et al., 2019). Second, different from DCMs that adopt  $\arg \max$  to obtain the final output, DRMs do not need  $\arg \max$ . This makes the backdoor behavior of the backdoored DRMs different from that of the backdoored DCMs. Specifically, for a backdoored DCM, the backdoor behavior is often triggered by the activation values of several neurons in the feature space (Wang et al., 2022b), whereas for a backdoored DRM, it is triggered by the activation values of all the neurons, which makes it harder to be detected or mitigated.

**Our work:** In this paper, we propose DRMGuard, the first framework to detect backdoored DRMs in the image domain. DRMGuard is applied to a DRM to reverse engineer a potential trigger function, based on which we make the decision on whether the model has been injected a backdoor or not. A major challenge to reverse engineering of the potential trigger function in the regression domain is that the output is defined in the continuous space. To address this challenge, we formulate the reverse engineering as an optimization problem, which is based on both output-space and feature-space characteristics of the backdoored DRMs that are observed in this paper.

To demonstrate the effectiveness of DRMGuard, we consider two regression tasks, and conduct extensive experiments on four datasets for state-of-the-art backdoor attacks. Our experimental results suggest that DRMGuard is consistently effective in defending both input-independent attacks, e.g., BadNets (Gu et al., 2019), and input-aware attacks, e.g., Input-aware dynamic attack (Nguyen & Tran, 2020). Furthermore, we adapt four state-of-the-art backdoor defenses, i.e., Neural Cleanse (Wang et al., 2019), FeatureRE (Wang et al., 2022b), ANP (Wu & Wang, 2021), and Fine-pruning (Liu et al., 2018a), designed for classifiers to regression models and compare DRMGuard with them. The results demonstrate that DRMGuard outperforms all of them by a large margin.

## 2 BACKGROUND AND RELATED WORK

**Backdoor Attacks:** Many backdoor attacks (Chen et al., 2017; Gu et al., 2019; Liu et al., 2018b; Phan et al., 2022; Wang et al., 2022a;c; Yao et al., 2019; Zhao et al., 2022) have been proposed for deep neural networks. They showed that an attacker can inject a backdoor into a classifier and make it output an attacker-chosen target class for any input embedded with an attacker-chosen backdoor trigger. Depending on whether the attacker uses the same backdoor trigger for different testing inputs, we categorize existing attacks into *input-independent attacks* (Chen et al., 2017; Gu et al., 2019; Liu et al., 2018b; Turner et al., 2019; Yao et al., 2019) and *input-aware attacks* (Koffas et al., 2022; Li et al., 2021b; Nguyen & Tran, 2021; 2020; Salem et al., 2022). For instance, Gu et al. (2019) proposed an input-independent backdoor attack by using a fixed pattern, e.g., a white patch, as the backdoor trigger. Recently, researchers proposed to use input-aware techniques, such as the warping process (Nguyen & Tran, 2021) and generative models (Nguyen & Tran, 2020), to generate dynamic triggers varying from input to input. When extending those attacks to DRMs (Sun et al., 2022), an attacker can inject a backdoor and make the model output a fixed vector (called *target vector*) for any testing input with the backdoor trigger. Lastly, backdoor attacks were also studied for graph neural networks (Xi et al., 2021; Zhang et al., 2021) and natural language processing (Shen et al., 2021). They are out of the scope of this paper as we focus on attacks in the image domain.

**Existing Defenses:** We categorize existing defenses against backdoor attacks into *data-level defenses* (Doan et al., 2020; Gao et al., 2019; Ma et al., 2023) and *model-level defenses* (Liu et al., 2022; 2019; Wu & Wang, 2021; Xiang et al., 2022; Zeng et al., 2022; Zheng et al., 2022). Data-level defenses detect whether a training example or a testing input is backdoored or not. They usually have two major limitations: 1) training data detection defenses (Chen et al., 2018) are not applicable for a given model that is already backdoored; and 2) testing input detection defenses (Doan et al., 2020) need to inspect each testing input at the running time and incur extra computation cost, and thus are undesired for latency-critical applications, e.g., gaze estimation (Zhang et al., 2020). Therefore, we focus on model-level defense in this work.

Model-level defenses detect whether a given model is backdoored or not, and state-of-the-art methods (Guan et al., 2022; Qiao et al., 2019; Wang et al., 2019; 2022b; Xiang et al., 2022) are based

on trigger reverse engineering. Specifically, they view each class as a potential target class and reverse engineer a backdoor trigger for it. Given the reverse-engineered backdoor triggers, they use statistical techniques to determine whether the classification model is backdoored or not. However, existing solutions are mainly designed for classification tasks that have categorical output. As we will show in this paper, they cannot be applied to DRMs. We note that Li et al. (2021a) also studied backdoor defense for DRMs, but they only considered a specific attack designed in their paper where the inputs of the regression model are low-dimensional vectors, i.e., five dimensional vectors. By contrast, we consider DRMs in the high-dimensional image domain.

### 3 DESIGN OF DRMGUARD

#### 3.1 THREAT MODEL

**Deep regression model:** A deep regression model (DRM) is a deep neural network that maps an input to a vector, i.e.,  $f : \mathcal{X} \mapsto \mathcal{Y}$ , where  $\mathcal{X} \subset \mathbb{R}^{N_w \times N_h \times N_c}$  represents the input space with width  $N_w$ , height  $N_h$ , and channel  $N_c$ ; and  $\mathcal{Y} \in \mathbb{R}^d$  represents the  $d$ -dimensional output space. Given a training dataset  $\mathcal{D}_{tr}$  that contains a set of training examples, we define the following loss  $\frac{1}{|\mathcal{D}_{tr}|} \sum_{(x,y) \in \mathcal{D}_{tr}} \ell(f(x), y)$ , where  $(x, y)$  is a training example in  $\mathcal{D}_{tr}$  and  $\ell$  is the loss function for the regression task (e.g.,  $\ell_2$  loss) to update the parameters of  $f$ .

**Backdoor attacks:** We consider existing backdoor attacks for classification models (Gu et al., 2019; Nguyen & Tran, 2021; 2020; Turner et al., 2019), and adapt them to DRMs. Specifically, given a training dataset  $\mathcal{D}_{tr}$ , an attacker can add backdoor triggers to the training samples in  $\mathcal{D}_{tr}$ , and change their ground-truth annotations to an attacker-chosen vector,  $y_T \in \mathcal{Y}$ , known as the *target vector*. The attacker can manipulate the training process. The backdoored DRM performs well on benign inputs, but outputs the target vector  $y_T$  when the backdoor trigger is present in the input. Formally, we define the backdoor attack for DRMs as:

$$f(x) = y, f(\mathcal{A}(x)) = y_T, \quad (1)$$

where  $f$  is the backdoored DRM,  $x \in \mathcal{X}$  is the benign input;  $y \in \mathcal{Y}$  is the benign ground-truth annotation; and  $\mathcal{A}$  is the trigger function that constructs the poisoned input from the benign input.

**Evaluation metric for backdoor attacks:** Given a set of poisoned inputs, we define attack error (AE) as the average regression error calculated from the output vectors and the target vector over all the poisoned inputs, to evaluate the performance of backdoor attacks on DRMs. AE can be regarded as the counterpart to the attack success rate for backdoor attacks on classification models.

**Assumptions and goals of the defender:** The defense goal is to identify if a DRM has been backdoored or not. Following existing defenses for backdoor attacks (Liu et al., 2019; Wang et al., 2019; 2022b), we assume the defender can access the trained DRM and a small benign dataset  $\mathcal{D}_{be}$  with correct annotations.

#### 3.2 OVERVIEW OF DRMGUARD

We propose DRMGuard to identify if a DRM has been backdoored by reverse engineering the trigger function  $\mathcal{A}$ . Figure 1 shows the overview of DRMGuard. We use a generative model  $G_\theta$  to model  $\mathcal{A}$ . This allows us to model the trigger function for both input-independent and input-aware attacks. For a given DRM  $f$  under examination, we split it into two submodels. Specifically, we first use the submodel  $F$  to map the original input  $x$  to the feature space  $F(x) \in \mathbb{R}^m$ , i.e., the output space of the last but second layer of  $f$ . Then, we use the submodel  $H$  to map the intermediate feature from the feature space to the final output space. This allows us to investigate the characteristics of the backdoored DRMs in both feature space and output space, based on which we formulate the optimization problem for reverse engineering. Moreover, we propose a strategy called *momentum reverse trigger* to reverse high-quality triggers.

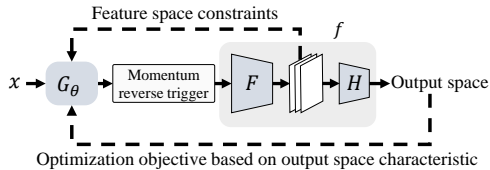

Figure 1: Overview of DRMGuard.

### 3.3 OBSERVATIONS AND INTUITIONS FOR BACKDOORED DEEP REGRESSION MODEL

Reverse engineering is performed by solving an optimization problem with constraints that are designed based on observations in the input (Wang et al., 2019) or the feature space (Wang et al., 2022b). Existing work (Wang et al., 2022b) shows that by using feature-space constraints, one can reverse both input-independent trigger (Gu et al., 2019) and input-aware trigger (Nguyen & Tran, 2021; 2020) for a backdoored deep classification model (DCM). Following this trend, we consider feature-space constraints when designing the reverse engineering for DRM. Below, we first discuss the difference in the feature space between backdoored DCM and backdoored DRM. Then, through theoretical analysis and experiments, we introduce the key observation for backdoored DRM.

**Difference between backdoored DCM and DRM:** A key observation for backdoored DCMs is that the backdoor behavior is represented by the activation values of several neurons in the feature space (Liu et al., 2019; Wang et al., 2022b). Specifically, when a trigger is present in the input, the activation values of the affected neurons will drop into a certain range, making the backdoored DCM output the attacker-chosen target class regardless of the activation values of the other neurons. This is because, after applying a series of operations to the feature vector, a backdoored DCM utilizes  $\arg \max$  to obtain the final classification output. As long as the activation values of the affected neurons can make the target class have the highest probability, the influence of the other neurons on the final classification output will be eliminated by  $\arg \max$ . By contrast, the final regression output of a backdoored DRM is obtained by applying linear transformation (or followed by an activation function) to the feature vector without using  $\arg \max$ . Thus, the activation value of each neuron in the feature space contributes to the final output. This difference inspires us to take all the neurons into consideration when searching for the feature-space characteristics of backdoored DRMs, rather than looking at a few specific neurons only.

**Theoretical analysis and metrics:** We use  $\{h_i\}_{i=1}^N$  and  $\{h_i^p\}_{i=1}^N$  to denote the feature vectors extracted from a set of  $N$  benign inputs  $\{x_i\}_{i=1}^N$  and a set of poisoned inputs  $\{\mathcal{A}(x_i)\}_{i=1}^N$ , respectively, where  $h_i = F(x_i) \in \mathbb{R}^m$  and  $h_i^p = F(\mathcal{A}(x_i)) \in \mathbb{R}^m$ . We use  $y_{i,j}$  and  $y_{i,j}^p$  to denote the  $j$ th component of the output vector  $y_i = H(h_i) \in \mathbb{R}^d$  and  $y_i^p = H(h_i^p) \in \mathbb{R}^d$ .  $y_{i,j}^p$  is calculated by:

$$y_{i,j}^p = \Omega(w_j \cdot h_i^p + b_j) = \Omega(\|w_j\|_2 \|h_i^p\|_2 \cos \alpha_{i,j}^p + b_j), \quad (2)$$

where  $\Omega(\cdot)$  is the activation function;  $w_j \in \mathbb{R}^m$  and  $b_j \in \mathbb{R}$  are the weights vector and the bias of  $H$  for the  $j$ th component of the output vector, respectively;  $\alpha_{i,j}^p$  is the angle between  $h_i^p$  and  $w_j$ . Based on Equation 1, we have  $y_{1,j}^p \approx y_{2,j}^p \approx \dots \approx y_{N,j}^p$  if  $f$  is backdoored, which means  $\sigma^2(\{y_{i,j}^p\}_{i=1}^N)$  is a small positive value, where  $\sigma^2(\cdot)$  is the variance function. As shown in Equation 2, the value of  $\sigma^2(\{y_{i,j}^p\}_{i=1}^N)$  is influenced only by  $\|h_i^p\|_2$  and  $\alpha_{i,j}^p$ , as  $\|w_j\|_2$  and  $b_j$  are constant for a given DRM. Moreover, when  $f$  is backdoored,  $\sum_{j=1}^d \sigma^2(\{y_{i,j}^p\}_{i=1}^N)/d$  is a small positive value and influenced by  $\|h_i^p\|_2$  and  $\alpha_i^p$ , where  $\alpha_i^p = \{\alpha_{i,1}^p, \dots, \alpha_{i,d}^p\} \in \mathbb{R}^d$ . We use  $\alpha_{i,j}$  to denote the angle between  $h_i$  and  $w_j$ , and define  $\alpha_i$  as  $\alpha_i = \{\alpha_{i,1}, \dots, \alpha_{i,d}\} \in \mathbb{R}^d$ .

To further investigate how  $\|h_i^p\|_2$  and  $\alpha_i^p$  influence  $\sum_{j=1}^d \sigma^2(\{y_{i,j}^p\}_{i=1}^N)/d$ , we introduce **the ratio of norm variance (RNV)** and **the ratio of angle variance (RAV)**, as two feature-space metrics:

$$\text{RNV} = \sigma^2(\{\|h_i^p\|_2\}_{i=1}^N) / \sigma^2(\{\|h_i\|_2\}_{i=1}^N) \text{ and } \text{RAV} = \frac{1}{d} \sum_{j=1}^d \sigma^2(\{\alpha_{i,j}^p\}_{i=1}^N) / \sigma^2(\{\alpha_{i,j}\}_{i=1}^N). \quad (3)$$

Specifically, RNV compares the dispersion of  $\{\|h_i^p\|_2\}_{i=1}^N$  and  $\{\|h_i\|_2\}_{i=1}^N$ , while RAV compares the dispersion of  $\{\alpha_i^p\}_{i=1}^N$  and  $\{\alpha_i\}_{i=1}^N$ .  $\text{RNV} \ll 1$  indicates that when triggers are present in the inputs, the feature vectors extracted by  $F$  have similar norms.  $\text{RAV} \ll 1$  means that the variance of angles between  $\{h_i^p\}_{i=1}^N$  and  $w_j$  are much smaller than that between  $\{h_i\}_{i=1}^N$  and  $w_j$  for  $j = 1, \dots, d$ .

**Observations:** We use four backdoor attacks, i.e., BadNets (Gu et al., 2019), Input-aware dynamic attack (IA) (Nguyen & Tran, 2020), WaNet (Nguyen & Tran, 2021), and Clean Label (Turner et al., 2019), to train backdoored DRMs on MPIIFaceGaze dataset (Zhang et al., 2017a) and Biwi Kinect dataset (Fanelli et al., 2013). Table 1 shows the RNV and the RAV of the backdoored DRMs that are trained by different backdoor attacks on the two datasets. The key observation is that RAV is significantly smaller than 0.1 in all the examined scenarios. To further explore this observation, the scatter plots in Figure 2 visualize  $\{\alpha_i^p\}_{i=1}^N$  and  $\{\alpha_i\}_{i=1}^N$  in all the examined cases. We can see

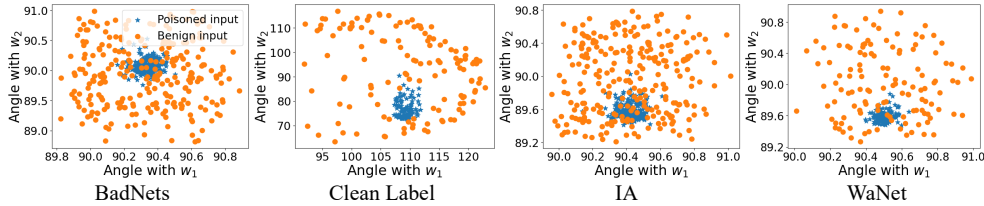(a) Backdoored DRMs trained on MPIIFaceGaze under different backdoor attacks ( $d = 2$ ).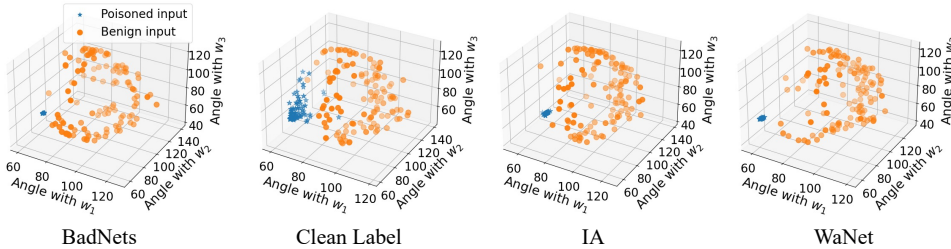(b) Backdoored DRMs trained on Biwi Kinect under different backdoor attacks ( $d = 3$ ).

Figure 2: The plots of  $\{\alpha_i^p\}_{i=1}^N$  and  $\{\alpha_i\}_{i=1}^N$  (in degree) for backdoored DRMs trained on (a) MPIIFaceGaze dataset and (b) Biwi Kinect dataset. The spread of the data points shows that the angles of the poisoned inputs are highly concentrated, while the angles of the benign inputs are scattered.

that the angles of the poisoned inputs are highly concentrated, while the angles of the benign inputs are scattered, meaning that  $\sigma^2(\{\alpha_{i,j}^p\}_{i=1}^N) \ll \sigma^2(\{\alpha_{i,j}\}_{i=1}^N)$  for  $j = 1, \dots, d$ . We summarize this observation in the feature space as follows.

**Key observation for backdoored DRMs in the feature space:** Consider a set of benign inputs  $\{x_i\}_{i=1}^N$  and a set of poisoned inputs  $\{\mathcal{A}(x_i)\}_{i=1}^N$ . Let  $W = \{w_1, w_2, \dots, w_d\}^T \in \mathbb{R}^{m \times d}$  be the weights matrix of  $H$ , where  $w_j \in \mathbb{R}^m$ . Then, we have the following observation:

$$\sigma^2(\{\mathcal{B}(F(\mathcal{A}(x_i)), w_j)\}_{i=1}^N) \ll \sigma^2(\{\mathcal{B}(F(x_i), w_j)\}_{i=1}^N) \text{ for } j = 1, 2, \dots, d, \quad (4)$$

where  $\mathcal{B}(v_1, v_2) = \arccos(v_1 \cdot v_2) / (\|v_1\|_2 \|v_2\|_2)$ ; and  $\mathcal{A}$  is the trigger function.

Lastly, Table 1 shows that RNV is close to or greater than 0.1 for backdoored DRMs trained by BadNets, IA, and WaNet on MPIIFaceGaze, while for the other examined cases, RNV is significantly smaller than 0.1. This is because, as shown in Figure 2, when  $\text{RNV} \geq 0.1$ , each component of  $\alpha_i^p$ , i.e.,  $\alpha_{i,j}^p$  for  $j = 1, \dots, d$ , is almost  $90^\circ$ , for  $i = 1, \dots, N$ , meaning that  $\cos \alpha_{i,j}^p$  is almost zero. Thus,  $y_{i,j}^p$  is insensitive to the change of  $\|h_i^p\|_2$ , which allows RNV to be similar to or even larger than 0.1 but still maintain a low  $\sigma^2(\{y_{i,j}^p\}_{i=1}^N)$ .

Table 1: The RNV and RAV for four attacks on two datasets. In all the examined cases, RAV is significantly smaller than 0.1.

| Attack      | MPIIFaceGaze |        | Biwi Kinect |        |
|-------------|--------------|--------|-------------|--------|
|             | RAV          | RNV    | RAV         | RNV    |
| BadNets     | 0.0433       | 1.4499 | 0.0002      | 0.0012 |
| IA          | 0.0489       | 2.5714 | 0.0015      | 0.0046 |
| Clean Label | 0.0328       | 0.0428 | 0.0803      | 0.0341 |
| WaNet       | 0.0311       | 0.8528 | 0.0003      | 0.0015 |

### 3.4 METHODOLOGY

**Reverse engineering for DRM:** One major challenge for reverse engineering for DRM is that the target vector  $y_T$  is defined in the continuous output space. As a result, it is impossible to enumerate and analyze all the potential target vectors using existing reverse engineering methods designed for DCM, which treat each class as a potential target class and reverse the trigger for it (Wang et al., 2019; 2022b). To resolve this challenge, we propose to reverse engineer  $\mathcal{A}$  by minimizing:  $\sum_{j=1}^d \sigma^2(\{f_j(G_\theta(x_i))\}_{i=1}^N) / d$ , where  $f_j(G_\theta(x_i))$  is the  $j$ th component of  $f(G_\theta(x_i)) \in \mathbb{R}^d$ . This is intuitive, as for a backdoored  $f$  the term  $\frac{1}{d} \sum_{j=1}^d \sigma^2(\{y_{i,j}^p\}_{i=1}^N)$  will be a small positive value. Thus, we can search for the target vector in the continuous output space by learning a trigger function  $\mathcal{A}$ , modeled by  $G_\theta$ , that can mislead  $f$  to map different inputs to the target vector without enumerating all the potential target vectors. Moreover, based on the key observation of backdoored DRMs defined in Inequation 4, we introduce the feature-space regularization term in the optimiza-

tion. Formally, we define the optimization problem for the reverse engineering for DRM as:

$$\theta^* = \min_{\theta} \frac{\lambda_1}{d} \sum_{j=1}^d \sigma^2 \left( \{f_j(x'_i)\}_{i=1}^N \right) + \frac{1}{N} \sum_{i=1}^N \|x'_i - x_i\|_1 + \lambda_2 r_f, \quad (5)$$

where  $r_f = \frac{1}{d} \sum_{j=1}^d \sigma^2(\{\mathcal{B}(F(x'_i), w_j)\}_{i=1}^N) / \sigma^2(\{\mathcal{B}(F(x_i), w_j)\}_{i=1}^N)$ ;  $x'_i = G_{\theta}(x_i)$ ; and  $\lambda_1$  and  $\lambda_2$  are the weights for the first and third objectives, respectively. The first objective in the optimization problem aims to reverse engineer the poisoned inputs  $\{G_{\theta}(x_i)\}_{i=1}^N$  that lead to the same output vector, regardless of their actual contents. The second objective is the input-space regularization term (Wang et al., 2019; 2022b) that ensures the transformed input  $G_{\theta}(x_i)$  is similar to the benign input  $x_i$ . The final objective is the feature-space regularization term, which can lead to a much lower variance for  $\{\hat{\alpha}_{i,j}^p\}_{i=1}^N$  than that for  $\{a_{i,j}\}_{i=1}^N$ , where  $\hat{\alpha}_{i,j}^p$  is the angle between  $F(G_{\theta}(x_i))$  and  $w_j$ .

**Momentum reverse trigger:** Directly solving the optimization problem defined in Equation 5 can result in a sub-optimal solution (illustrated in Appendix A.1): the algorithm focuses on the important regions in the input image, to which the DRM pay more attention, and directly adds perturbations to these regions to *destroy* the task-related features. To avoid such a trivial solution, we propose the *momentum reverse trigger* to assign different weights to different regions to balance the attention of the DRM on the image, such that the algorithm can pay attention to all the image pixels and search for the trigger that are injected into both important and unimportant regions. Details about the momentum reverse trigger are given in Appendix A.1. After introducing the momentum reverse trigger into Equation 5, we use *OPT-DRMGuard* to denote the final optimization problem.

**Backdoor identification:** By solving the optimization problem *OPT-DRMGuard*, we can obtain the perturbation  $\|x'_i - x_i\|$  that transforms input  $x_i$  to the potential target vector. We observe that the amount of perturbation required to transform the input to the potential target vector for a backdoored DRM is significantly smaller than that for a benign DRM. Based on this observation, *DRMGuard* introduces the metric  $\mathcal{I}(f) = \mathbb{1}(\frac{1}{N} \sum_{i=1}^N \|x'_i - x_i\|_1, \epsilon \|\hat{x}\|_1)$ , to identify if a given deep regression model is backdoored or not, where  $\|\hat{x}\|_1$  is the input image that has the maximum  $L1$  norm in the benign dataset  $\mathcal{D}_{be}$ ;  $\epsilon$  is a constant; and  $\mathbb{1}$  is the indicator function that returns 1 (backdoored DRM) if  $\frac{1}{N} \sum_{i=1}^N \|x'_i - x_i\|_1 < \epsilon \|\hat{x}\|_1$  and 0 (benign DRM) otherwise. We set  $\epsilon = 0.03$ .

**Backdoor mitigation:** Once a given DRM is identified as a backdoored DRM, *DRMGuard* uses the reversed trigger function  $G_{\theta}$  and the available benign dataset  $\mathcal{D}_{be}$  to generate a reversed poisoned dataset  $\mathcal{D}_{rp}$  with the original correct annotations. Then, *DRMGuard* fine-tunes the given backdoored DRM by using  $\mathcal{D}_{be}$  and  $\mathcal{D}_{rp}$  to unlearn the backdoor behavior.

## 4 EVALUATION

### 4.1 EXPERIMENTAL SETUP

**Regression tasks:** We consider two regression tasks, i.e., gaze estimation and head pose estimation. Gaze estimation tracks where the subject is looking at, and plays a key role in a series of safety-critical applications, such as user authentication (Eberz et al., 2019; Katsini et al., 2020) and driver distraction detection (Berman, 2020). Similarly, head pose estimation has also been used in many safety-related applications, such as the driver assistance system (Jha & Busso, 2016; Murphy-Chutorian et al., 2007) and pedestrian attention monitoring (Schulz & Stiefelhagen, 2012).

**Datasets:** We consider four benchmark datasets, i.e., MPIIFaceGaze (Zhang et al., 2019), Columbi-aGaze (Smith et al., 2013), Biwi Kinect (Fanelli et al., 2013), and Pandora (Borghi et al., 2017). For each dataset, we randomly select 80% and 10% of the images from the dataset to form the training dataset  $\mathcal{D}_{tr}$  and the benign dataset  $\mathcal{D}_{be}$ , respectively. We use the remainder as the testing set  $\mathcal{D}_{te}$  to evaluate the performance of backdoor mitigation. Details of datasets can be found in Appendix A.2.

**Backdoor attacks:** We consider four state-of-the-art backdoor attacks, including two input-independent attacks, i.e., BadNets (Gu et al., 2019) and Clean Label (Turner et al., 2019), and two input-aware attacks, i.e., Input-aware dynamic attack (IA) (Nguyen & Tran, 2020) and WaNet (Nguyen & Tran, 2021). We detail how to adapt these backdoor attacks to DRMs and the effectiveness of them on DRMs in Appendix A.3.

Table 2: Backdoor identification performance of DRMGuard on MPIIFaceGaze for different attacks. DRMGuard can defend various attacks.

| Attack      | TP | FP | FN | TN | Acc |
|-------------|----|----|----|----|-----|
| BadNets     | 10 | 1  | 0  | 9  | 95% |
| IA          | 10 | 1  | 0  | 9  | 95% |
| Clean Label | 10 | 1  | 0  | 9  | 95% |
| WaNet       | 10 | 1  | 0  | 9  | 95% |

Table 3: Backdoor identification performance of DRMGuard on different datasets for WaNet. DRMGuard is effective on various datasets.

| Dataset      | TP | FP | FN | TN | Acc  |
|--------------|----|----|----|----|------|
| MPIIFaceGaze | 10 | 1  | 0  | 9  | 95%  |
| ColumbiaGaze | 8  | 4  | 2  | 6  | 70%  |
| Biwi Kinect  | 10 | 0  | 0  | 10 | 100% |
| Pandora      | 7  | 0  | 3  | 10 | 85%  |

**Compared defenses:** For backdoor identification, we compare DRMGuard with two state-of-the-art methods, i.e., Neural Cleanse (NC) (Wang et al., 2019) and FeatureRE (Wang et al., 2022b). Since the output space of DRM is continuous, we generalize them from classification models to regression models by taking the potential target vector  $y_t$  as the optimization variable. We provide details of the generalizations in Appendix A.4. For backdoor mitigation, we compare DRMGuard with two state-of-the-art methods, i.e., ANP (Wu & Wang, 2021) and Fine-pruning (Liu et al., 2018a).

**Evaluation metrics:** Following existing work (Wang et al., 2022b), we use the identification accuracy as the performance metric. In detail, given a set of DRMs including benign and backdoored DRMs, the identification accuracy is defined as the percentage of correctly classified DRMs over all examined DRMs. We also report the number of True Positives (TP), i.e., correctly identified backdoored DRMs, False Positives (FP), i.e., benign DRMs recognized as backdoored DRMs, False Negatives (FN), i.e., backdoored DRMs identified as benign DRMs, and True Negatives (TN), i.e., correctly recognized benign DRMs. Moreover, we use ROC-AUC score to compare backdoor identification performance between DRMGuard, NC, and FeatureRE, after obtaining the average perturbations on  $\mathcal{D}_{be}$  for benign DRMs and backdoored DRMs.

To evaluate the performance of DRMGuard on backdoor mitigation, we generate a poisoned dataset  $\mathcal{PD}_{te}$  by applying trigger function to all the images in  $\mathcal{D}_{te}$ . We define defending attack error (DAE) as the average regression error calculated from the output vectors and the correct annotations over all the images in  $\mathcal{PD}_{te}$ . Details of regression errors for the two examined regression tasks are given in Appendix A.2. We use DAE and AE on  $\mathcal{PD}_{te}$  as the evaluation metrics for backdoor mitigation.

**Defense settings:** Unless otherwise mentioned, we set  $\lambda_1 = 20$  and  $\lambda_2 = 800$  for gaze estimation, and set  $\lambda_1 = 10$  and  $\lambda_2 = 100$  for head pose estimation, given task difference. We use ResNet18 (He et al., 2016) (without the dense layer) to implement  $F$ , and a dense layer without activation function to implement  $H$ . We consider gaze estimation task with MPIIFaceGaze dataset and the state-of-the-art input-aware attack WaNet.

## 4.2 EVALUATION RESULTS ON BACKDOOR IDENTIFICATION

**DRMGuard is effective for backdoor identification:** We conduct three experiments to evaluate the backdoor identification performance. First, we evaluate the performance of DRMGuard in identifying backdoored DRMs trained by different attacks. Specifically, for each of the four backdoor attacks, i.e., BadNets, Clean Label, WaNet, and IA, we train ten benign DRMs and ten backdoored DRMs on MPIIFaceGaze dataset. The results are shown in Table 2, which indicate that DRMGuard can identify backdoored DRMs trained by both input-independent and input-aware attacks, at an average accuracy of 95%. Moreover, we visualize the estimation of the target vector during the training process and the reversed trigger in the Appendix A.5 and A.6, respectively.

Second, we examine the backdoor identification capability of DRMGuard on different regression tasks and datasets, i.e., MPIIFaceGaze, ColumbiaGaze, Biwi Kinect, and Pandora. Specifically, we train ten benign DRMs and ten backdoored DRMs using WaNet for each dataset. The results are shown in Table 3. The average identification accuracy of DRMGuard on different datasets is 87.5%, which demonstrates the effectiveness of DRMGuard on various regression tasks and datasets.

Finally, we consider the scenario where the DRM is backdoored by multiple trigger functions with different target vectors. We report the attacking details and evaluation results in Appendix A.7. In brief, the results show that our method is effective on identifying DRMs with multiple backdoors.

**DRMGuard outperforms state-of-the-art defenses:** Table 4 shows the ROC-AUC scores of DRMGuard, NC, and FeatureRE for four backdoor attacks. We also report the scores when ap-

Table 4: ROC-AUC scores of different methods on MPIIFaceGaze for different attacks. DRMGuard significantly outperforms NC and FeatureRE.

| Attack      | NC    | FeatureRE | DRMGuard     |
|-------------|-------|-----------|--------------|
| BadNets     | 0.270 | 0.730     | <b>1.000</b> |
| IA          | 0.300 | 0.560     | <b>1.000</b> |
| WaNet       | 0.940 | 0.560     | <b>1.000</b> |
| Clean Label | 0.005 | 0.545     | <b>1.000</b> |
| All attacks | 0.379 | 0.599     | <b>1.000</b> |

Table 5: Performance of backdoor mitigation for different attacks. DRMGuard can mitigate backdoor behaviors for various attacks.

| Attack      | Undefended |       | DRMGuard |      |
|-------------|------------|-------|----------|------|
|             | AE         | DAE   | AE       | DAE  |
| BadNets     | 3.25       | 14.85 | 17.21    | 3.59 |
| IA          | 3.19       | 14.40 | 15.69    | 3.50 |
| Clean Label | 0.72       | 15.43 | 16.42    | 2.51 |
| WaNet       | 1.31       | 15.90 | 15.36    | 3.29 |

plying the four backdoor attacks simultaneously. As shown, the ROC-AUC score of DRMGuard is 1.000 in all the examined cases, which is significantly higher than that of NC and FeatureRE. Besides, we notice that FeatureRE fails to find a trigger function that enables the backdoored DRM to map different inputs to similar output vectors, which confirms our analysis that the feature-space characteristic for backdoored DCM (Wang et al., 2022b) does not hold for backdoored DRM.

### 4.3 EVALUATION RESULTS ON BACKDOOR MITIGATION

We train backdoored DRMs using BadNets, Clean Label, IA, and WaNet on MPIIFaceGaze. Table 5 shows AE and DAE of the undefended and mitigated backdoored DRMs, which indicate that DRMGuard can mitigate backdoor behaviors for various attacks. Specifically, DRMGuard can significantly increase AE and decrease DAE for all the attacks, which indicates that the output vectors of DRMs are far away from the target vector and close to the correct annotations after backdoor mitigation, even though triggers are injected in the inputs.

Table 6: Performance of different methods on backdoor mitigation. DRMGuard outperforms baselines.

| Method       | AE           | DAE         |
|--------------|--------------|-------------|
| Undefended   | 1.31         | 15.90       |
| DRMGuard     | <b>15.36</b> | <b>3.29</b> |
| Fine-tuning  | 13.96        | 4.32        |
| Fine-pruning | 6.68         | 16.82       |
| ANP          | 4.92         | 13.13       |

We compare DRMGuard with ANP and Fine-pruning on backdoor mitigation. We also consider a baseline, i.e., Fine-tuning, which directly uses the benign dataset  $\mathcal{D}_{be}$  to fine tune the backdoored DRM. We report AE and DAE for different methods after backdoor mitigation in Table 6. The AE for DRMGuard is significantly larger than that for other methods, while the DAE for DRMGuard is much smaller than that for other methods, which shows the superiority of DRMGuard on backdoor mitigation. Moreover, Fine-pruning and ANP are built upon the feature-space characteristics of backdoored DCM and perform terribly on backdoored DRMs. This also confirms our analysis that the feature-space characteristics of backdoored DRMs are different with that of backdoored DCM.

### 4.4 ABLATION STUDIES

**Impact of weights and the size of benign dataset:** To investigate the impact of  $\lambda_1$  and  $\lambda_2$  in Equation 5 on the performance of backdoor identification, we vary  $\lambda_1$  and  $\lambda_2$  from 10 to 30 and from 600 to 800, respectively. Moreover, we study the impact of the size of  $\mathcal{D}_{be}$  on the identification performance by changing the ratio  $p$  of benign dataset to the original whole dataset from 5% to 15%.

We report the results in Table 7. We observe that the performance of DRMGuard is insensitive to  $\lambda_1$ , as the identification accuracy is almost stable with different  $\lambda_1$ . However, DRMGuard is sensitive to  $\lambda_2$  and the identification accuracy increases with  $\lambda_2$ . This observation proves that the proposed feature-space regularization term is important for the identification of backdoored DRMs. We also observe that as  $p$  decreases from 15% to 5%, the identification accuracy and the number of TN decrease, while the number of TP remains stable. This is because, compared to a large  $p$ , it is easier to find a small amount of perturbation that can lead to the backdoor behavior on a small  $p$  for benign models. However, the identification accuracy is still 90% even when  $p = 5\%$ .

**Impact of feature-space regularization term (FSRT):** We remove FSRT from *OPT*-DRMGuard and show the results in Table 8, which indicate that all the DRMs are classified as backdoored DRMs. We further observe that without the FSRT, DRMGuard cannot find a trigger function that can map different inputs to similar output vectors. As a result, DRMGuard solves the optimization problem by focusing on minimizing the distance between the poisoned and benign images, and returns a small amount of perturbations, which leads to the misclassification of backdoored DRMs.



Table 7: Ablation study on the impact of different value of  $\lambda_1$ ,  $\lambda_2$  and  $p$ .

| Metric | Different $\lambda_1$ |     |     | Different $\lambda_2$ |     |      | Different $p$ |     |      |
|--------|-----------------------|-----|-----|-----------------------|-----|------|---------------|-----|------|
|        | 10                    | 20  | 30  | 600                   | 800 | 1000 | 5%            | 10% | 15%  |
| TP     | 10                    | 10  | 10  | 10                    | 10  | 10   | 10            | 10  | 10   |
| FP     | 0                     | 1   | 1   | 5                     | 1   | 0    | 2             | 1   | 0    |
| FN     | 0                     | 0   | 0   | 0                     | 0   | 0    | 0             | 0   | 0    |
| TN     | 10                    | 9   | 9   | 5                     | 9   | 10   | 8             | 9   | 10   |
| Acc    | 100%                  | 95% | 95% | 75%                   | 95% | 100% | 90%           | 95% | 100% |

Table 8: Ablation study on FSRT and MTR.

| Method   | TP | FP | FN | TN | Acc |
|----------|----|----|----|----|-----|
| w/o FSRT | 10 | 10 | 0  | 0  | 50% |
| w/o MTR  | 10 | 10 | 0  | 0  | 50% |

Table 9: Evaluation results on adaptive attack.

| Attack   | AE   | DAE   | Acc |
|----------|------|-------|-----|
| WaNet    | 1.51 | 15.99 | 95% |
| Adaptive | 5.71 | 15.01 | 95% |

**Impact of momentum reverse trigger (MTR):** We remove the MTR from *OPT*-DRMGuard and report the identification results in Table 8. As shown, all the benign DRMs are classified as backdoored DRMs. This is because, without the MTR, DRMGuard will find a small amount of perturbation and add it to the eye regions to destroy gaze-related features and fool the benign models. In this way, the poisoned images reversed from different images are transformed by  $f$  to similar output vectors, and DRMGuard fails to correctly recognize benign DRMs.

#### 4.5 ADAPTIVE ATTACKS

When the attacker has the full knowledge of DRMGuard, one potential adaptive attack that can bypass our method is to force the left and the right terms in Inequation 4 to have similar values. Based on this intuition, we design an adaptive attack that adds an additional loss term  $L_{adp}$  with a weight  $\lambda_{adp}$  to the original loss function of the chosen backdoor attack. We define  $L_{adp}$  as:

$$L_{adp} = \left| 1 - \frac{1}{d} \sum_{j=1}^d \sigma^2 \left( \left\{ \mathcal{B}(F(\mathcal{A}(x_i)), w_j) \right\}_{i=1}^{N_p} \right) / \sigma^2 \left( \left\{ \mathcal{B}(F((x_i), w_j) \right\}_{i=1}^{N_b} \right) \right|, \quad (6)$$

where  $N_p$  and  $N_b$  are the numbers of poisoned inputs and benign inputs in a minibatch. The loss term  $L_{adp}$  tries to break the feature-space observation by enforcing RAV to be close to one. We generate ten backdoored DRMs by the adaptive attack with  $\lambda_{adp} = 0.02$ . Table 9 shows the identification accuracy and the averaged AE and DAE over ten backdoored DRMs. The AE of the adaptive attack is significantly higher than that of WaNet. This proves that our feature-space observation of the backdoored DRM is the key characteristic leading to the backdoor behavior. The adaptive attack cannot reduce the identification accuracy of our method.

## 5 DISCUSSION AND LIMITATION

**Discussion.** To further investigate the performance of DRMGuard, we evaluate DRMGuard by considering more backdoor attacks, different architectures of DRMs, and a larger set of DRMs in Appendix A.8. The results show DRMGuard can consistently defend against various backdoor attacks and can be generalized to different architectures. Also, DRMGuard maintains a similar identification accuracy on a larger set of DRMs that contains more backdoored and benign DRMs.

**Limitation.** Similar to backdoor defenses (Wang et al., 2019; 2022b) for DCM, our method requires a small benign dataset to identify backdoored DRM and mitigate backdoor behaviors.

## 6 CONCLUSION

We propose the first backdoor identification method DRMGuard for deep regression models in the image domain. Our method fills in the gap where existing backdoor identification methods only focus on deep classification models. Our comprehensive evaluation shows that our method can defend against both input-independent and input-aware backdoor attacks on various datasets.

## REFERENCES

- Sam Abuelsamid. Seeing machines and BMW team up on driver monitoring at CSE. <https://www.forbes.com/sites/samabuelsamid/2020/01/07/seeing-machines-and-bmw-team-up-on-driver-monitoring-at-ces/>, 2020.
- M. Barni, K. Kallas, and B. Tondi. A new backdoor attack in cnns by training set corruption without label poisoning. In *2019 IEEE International Conference on Image Processing (ICIP)*, 2019.
- Bradley Berman. Driver-monitoring systems to be as common as seat belts. <https://www.sae.org/news/2020/02/smart-eye-safety-driver-monitoring>, 2020.
- Guido Borghi, Marco Venturelli, Roberto Vezzani, and Rita Cucchiara. Poseidon: Face-from-depth for driver pose estimation. In *Proceedings of the IEEE Conference on Computer Vision and Pattern Recognition (CVPR)*, July 2017.
- Bryant Chen, Wilka Carvalho, Nathalie Baracaldo, Heiko Ludwig, Benjamin Edwards, Taesung Lee, Ian Molloy, and Biplav Srivastava. Detecting backdoor attacks on deep neural networks by activation clustering. *arXiv preprint arXiv:1811.03728*, 2018.
- Xinyun Chen, Chang Liu, Bo Li, Kimberly Lu, and Dawn Song. Targeted backdoor attacks on deep learning systems using data poisoning. *arXiv preprint arXiv:1712.05526*, 2017.
- Bao Gia Doan, Ehsan Abbasnejad, and Damith C Ranasinghe. Februus: Input purification defense against trojan attacks on deep neural network systems. In *Proceedings of the Annual Computer Security Applications Conference (ACSAC)*, 2020.
- Simon Eberz, Giulio Lovisotto, Kasper B Rasmussen, Vincent Lenders, and Ivan Martinovic. 28 blinks later: Tackling practical challenges of eye movement biometrics. In *Proceedings of the ACM SIGSAC Conference on Computer and Communications Security (CCS)*, 2019.
- Gabriele Fanelli, Matthias Dantone, Juergen Gall, Andrea Fossati, and Luc Van Gool. Random forests for real time 3d face analysis. *International Journal of Computer Vision*, 101(3):437–458, February 2013.
- Yansong Gao, Change Xu, Derui Wang, Shiping Chen, Damith C Ranasinghe, and Surya Nepal. Strip: A defence against trojan attacks on deep neural networks. In *Proceedings of the Annual Computer Security Applications Conference (ACSAC)*, 2019.
- Tianyu Gu, Kang Liu, Brendan Dolan-Gavitt, and Siddharth Garg. Badnets: Evaluating backdooring attacks on deep neural networks. *IEEE Access*, 7:47230–47244, 2019. doi: 10.1109/ACCESS.2019.2909068.
- Jiyang Guan, Zhuozhuo Tu, Ran He, and Dacheng Tao. Few-shot backdoor defense using shapley estimation. In *Proceedings of the IEEE/CVF Conference on Computer Vision and Pattern Recognition (CVPR)*, June 2022.
- Junfeng Guo, Yiming Li, Xun Chen, Hanqing Guo, Lichao Sun, and Cong Liu. Scale-up: An efficient black-box input-level backdoor detection via analyzing scaled prediction consistency. *arXiv preprint arXiv:2302.03251*, 2023.
- Aryaman Gupta, Kalpit Thakkar, Vineet Gandhi, and PJ Narayanan. Nose, eyes and ears: Head pose estimation by locating facial keypoints. In *Proceedings of the IEEE International Conference on Acoustics, Speech and Signal Processing (ICASSP)*, 2019.
- Kaiming He, Xiangyu Zhang, Shaoqing Ren, and Jian Sun. Deep residual learning for image recognition. In *Proceedings of the IEEE Conference on Computer Vision and Pattern Recognition (CVPR)*, June 2016.
- Andrew G Howard, Menglong Zhu, Bo Chen, Dmitry Kalenichenko, Weijun Wang, Tobias Weyand, Marco Andreetto, and Hartwig Adam. Mobilenets: Efficient convolutional neural networks for mobile vision applications. *arXiv preprint arXiv:1704.04861*, 2017.

- Sumit Jha and Carlos Busso. Analyzing the relationship between head pose and gaze to model driver visual attention. In *Proceedings of IEEE International Conference on Intelligent Transportation Systems (ITSC)*, 2016.
- Christina Katsini, Yasmeen Abdrabou, George E Raptis, Mohamed Khamis, and Florian Alt. The role of eye gaze in security and privacy applications: Survey and future HCI research directions. In *Proceedings of the ACM Conference on Human Factors in Computing Systems (CHI)*, 2020.
- Stefanos Koffas, Stjepan Picek, and Mauro Conti. Dynamic backdoors with global average pooling. In *Proceedings of IEEE International Conference on Artificial Intelligence Circuits and Systems (AICAS)*, 2022.
- Felix Kuhnke and Jorn Ostermann. Deep head pose estimation using synthetic images and partial adversarial domain adaption for continuous label spaces. In *Proceedings of the IEEE/CVF International Conference on Computer Vision (ICCV)*, pp. 10164–10173, 2019.
- Stéphane Lathuilière, Pablo Mesejo, Xavier Alameda-Pineda, and Radu Horaud. A comprehensive analysis of deep regression. *IEEE Transactions on Pattern Analysis and Machine Intelligence (TPAMI)*, 42(9):2065–2081, 2019.
- Xi Li, George Kesidis, David J Miller, and Vladimir Lucic. Backdoor attack and defense for deep regression. *arXiv preprint arXiv:2109.02381*, 2021a.
- Yuezun Li, Yiming Li, Baoyuan Wu, Longkang Li, Ran He, and Siwei Lyu. Invisible backdoor attack with sample-specific triggers. In *Proceedings of the IEEE/CVF International Conference on Computer Vision (ICCV)*, October 2021b.
- Kang Liu, Brendan Dolan-Gavitt, and Siddharth Garg. Fine-pruning: Defending against backdooring attacks on deep neural networks. In *International symposium on research in attacks, intrusions, and defenses*, 2018a.
- Yang Liu, Mingyuan Fan, Cen Chen, Ximeng Liu, Zhuo Ma, Li Wang, and Jianfeng Ma. Backdoor defense with machine unlearning. In *Proceedings of the IEEE International Conference on Computer Communications (INFOCOM)*, 2022.
- Yingqi Liu, Shiqing Ma, Yousra Aafer, Wen-Chuan Lee, Juan Zhai, Weihang Wang, and Xiangyu Zhang. Trojaning attack on neural networks. In *Proceedings of Network and Distributed System Security (NDSS) Symposium*, 2018b.
- Yingqi Liu, Wen-Chuan Lee, Guanhong Tao, Shiqing Ma, Yousra Aafer, and Xiangyu Zhang. Abs: Scanning neural networks for back-doors by artificial brain stimulation. In *Proceedings of the 2019 ACM SIGSAC Conference on Computer and Communications Security*, 2019.
- Yunfei Liu, Xingjun Ma, James Bailey, and Feng Lu. Reflection backdoor: A natural backdoor attack on deep neural networks. In *Proceedings of European Conference on Computer Vision (ECCV)*, 2020.
- Wanlun Ma, Derui Wang, Ruoxi Sun, Minhui Xue, Sheng Wen, and Yang Xiang. The “beatrice” resurrections: Robust backdoor detection via gram matrices. In *Proceedings of Network and Distributed System Security (NDSS) Symposium*, 2023.
- Erik Murphy-Chutorian, Anup Doshi, and Mohan Manubhai Trivedi. Head pose estimation for driver assistance systems: A robust algorithm and experimental evaluation. In *Proceedings of IEEE Intelligent Transportation Systems Conference*, pp. 709–714. IEEE, 2007.
- Anh Nguyen and Anh Tran. Wanet–imperceptible warping-based backdoor attack. *arXiv preprint arXiv:2102.10369*, 2021.
- Tuan Anh Nguyen and Anh Tran. Input-aware dynamic backdoor attack. In *Proceedings of Conference on Advances in Neural Information Processing Systems (NeurIPS)*, 2020.
- Huy Phan, Yi Xie, Jian Liu, Yingying Chen, and Bo Yuan. Invisible and efficient backdoor attacks for compressed deep neural networks. In *Proceedings of IEEE International Conference on Acoustics, Speech and Signal Processing (ICASSP)*, 2022.

- Ximing Qiao, Yukun Yang, and Hai Li. Defending neural backdoors via generative distribution modeling. In *Proceedings of the Conference on Advances in neural information processing systems (NeurIPS)*, 2019.
- Mudassar Raza, Zonghai Chen, Saeed-Ur Rehman, Peng Wang, and Peng Bao. Appearance based pedestrians’ head pose and body orientation estimation using deep learning. *Neurocomputing*, 272:647–659, 2018.
- Ahmed Salem, Rui Wen, Michael Backes, Shiqing Ma, and Yang Zhang. Dynamic backdoor attacks against machine learning models. In *Proceedings of IEEE European Symposium on Security and Privacy (EuroS&P)*, 2022.
- Andreas Schulz and Rainer Stiefelhagen. Video-based pedestrian head pose estimation for risk assessment. In *Proceedings of IEEE International Conference on Intelligent Transportation Systems (ITSC)*, 2012.
- Lujia Shen, Shouling Ji, Xuhong Zhang, Jinfeng Li, Jing Chen, Jie Shi, Chengfang Fang, Jianwei Yin, and Ting Wang. Backdoor pre-trained models can transfer to all. In *Proceedings of the ACM SIGSAC Conference on Computer and Communications Security (CCS)*, 2021.
- B.A. Smith, Q. Yin, S.K. Feiner, and S.K. Nayar. Gaze Locking: Passive Eye Contact Detection for Human-Object Interaction. In *Proceedings of the ACM Symposium on User Interface Software and Technology (UIST)*, Oct 2013.
- Yi Sun, Xiaogang Wang, and Xiaoou Tang. Deep convolutional network cascade for facial point detection. In *Proceedings of the IEEE Conference on Computer Vision and Pattern Recognition (CVPR)*, pp. 3476–3483, 2013.
- Yuhua Sun, Tailai Zhang, Xingjun Ma, Pan Zhou, Jian Lou, Zichuan Xu, Xing Di, Yu Cheng, and Lichao Sun. Backdoor attacks on crowd counting. In *Proceedings of the 30th ACM International Conference on Multimedia*, 2022.
- Alexander Turner, Dimitris Tsipras, and Aleksander Madry. Label-consistent backdoor attacks. *arXiv preprint arXiv:1912.02771*, 2019.
- Bolun Wang, Yuanshun Yao, Shawn Shan, Huiying Li, Bimal Viswanath, Haitao Zheng, and Ben Y Zhao. Neural cleanse: Identifying and mitigating backdoor attacks in neural networks. In *Proceedings of the IEEE Symposium on Security and Privacy (SP)*, 2019.
- Fei Wang, Mengqing Jiang, Chen Qian, Shuo Yang, Cheng Li, Honggang Zhang, Xiaogang Wang, and Xiaoou Tang. Residual attention network for image classification. In *Proceedings of the IEEE Conference on Computer Vision and Pattern Recognition (CVPR)*, July 2017.
- Tong Wang, Yuan Yao, Feng Xu, Shengwei An, Hanghang Tong, and Ting Wang. An invisible black-box backdoor attack through frequency domain. In *Proceedings of European Conference on Computer Vision (ECCV)*, 2022a.
- Zhenting Wang, Kai Mei, Hailun Ding, Juan Zhai, and Shiqing Ma. Rethinking the reverse-engineering of trojan triggers. In *Proceedings of Conference on Advances in Neural Information Processing Systems (NeurIPS)*, 2022b.
- Zhenting Wang, Juan Zhai, and Shiqing Ma. Bppattack: Stealthy and efficient trojan attacks against deep neural networks via image quantization and contrastive adversarial learning. In *Proceedings of the IEEE/CVF Conference on Computer Vision and Pattern Recognition (CVPR)*, June 2022c.
- Dongxian Wu and Yisen Wang. Adversarial neuron pruning purifies backdoored deep models. In *Proceedings of the Conference on Advances in neural information processing systems (NeurIPS)*, 2021.
- Yue Wu and Qiang Ji. Facial landmark detection: A literature survey. *International Journal of Computer Vision (IJCV)*, 127:115–142, 2019.
- Zhaohan Xi, Ren Pang, Shouling Ji, and Ting Wang. Graph backdoor. In *Proceedings of the USENIX Security Symposium*, 2021.

- Zhen Xiang, David J. Miller, and George Kesidis. Detection of backdoors in trained classifiers without access to the training set. *IEEE Transactions on Neural Networks and Learning Systems*, 33(3):1177–1191, 2022. doi: 10.1109/TNNLS.2020.3041202.
- Yuanshun Yao, Huiying Li, Haitao Zheng, and Ben Y Zhao. Latent backdoor attacks on deep neural networks. In *Proceedings of the ACM SIGSAC Conference on Computer and Communications Security (CCS)*, 2019.
- Bernhard Zeisl, Torsten Sattler, and Marc Pollefeys. Camera pose voting for large-scale image-based localization. In *Proceedings of the IEEE International Conference on Computer Vision (ICCV)*, December 2015.
- Yi Zeng, Si Chen, Won Park, Z. Morley Mao, Ming Jin, and Ruoxi Jia. Adversarial unlearning of backdoors via implicit hypergradient. In *Proceedings of the International Conference on Learning Representations (ICLR)*, 2022.
- Xucong Zhang, Yusuke Sugano, Mario Fritz, and Andreas Bulling. It’s written all over your face: Full-face appearance-based gaze estimation. In *Proceedings of the IEEE Conference on Computer Vision and Pattern Recognition (CVPR) Workshops*, July 2017a.
- Xucong Zhang, Yusuke Sugano, Mario Fritz, and Andreas Bulling. MPIIGaze: Real-world dataset and deep appearance-based gaze estimation. *IEEE Transactions on Pattern Analysis and Machine Intelligence (TPAMI)*, 41(1):162–175, 2017b.
- Xucong Zhang, Yusuke Sugano, Mario Fritz, and Andreas Bulling. Mpiigaze: Real-world dataset and deep appearance-based gaze estimation. *IEEE Transactions on Pattern Analysis and Machine Intelligence (TPAMI)*, 2019.
- Xucong Zhang, Seonwook Park, Thabo Beeler, Derek Bradley, Siyu Tang, and Otmar Hilliges. Eth-xgaze: A large scale dataset for gaze estimation under extreme head pose and gaze variation. In *Proceedings of the European Conference on Computer Vision (ECCV)*, 2020.
- Zaixi Zhang, Jinyuan Jia, Binghui Wang, and NZ Gong. Backdoor attacks to graph neural networks. In *Proceedings of the ACM Symposium on Access Control Models and Technologies (SACMAT)*, 2021.
- Zhendong Zhao, Xiaojun Chen, Yuexin Xuan, Ye Dong, Dakui Wang, and Kaitai Liang. Defeat: Deep hidden feature backdoor attacks by imperceptible perturbation and latent representation constraints. In *Proceedings of the IEEE/CVF Conference on Computer Vision and Pattern Recognition (CVPR)*, June 2022.
- Runkai Zheng, Rongjun Tang, Jianze Li, and Li Liu. Data-free backdoor removal based on channel lipschitzness. In *Proceedings of European Conference on Computer Vision (ECCV)*, 2022.

## A APPENDIX

**Roadmap:** We provide the details of the momentum reverse trigger in subsection A.1. The details of two regression tasks and four datasets are discussed in subsection A.2. Subsection A.3 describes the details of backdoor attacks and discusses how to generalize them to regression tasks. Then, we show the details about how to generalize Neural Cleanse (Wang et al., 2019) and FeatureRE (Wang et al., 2022b) to the deep regression model (DRM) in subsection A.4. Next, we visualize the estimation of the target vector during the reverse engineering process and the reversed poisoned images in subsection A.5 and subsection A.6, respectively. After that, we detail multi-target backdoor attack for DRMs in subsection A.7. We evaluate DRMGuard on more backdoor attacks, different architectures of DRMs, and a larger set of DRMs in Appendix A.8. We show that our idea of minimizing the variance can be extended to classification domain for trigger reverse engineering in Appendix A.9. Finally, we report the technical details of DRMGuard in subsection A.10.

**Experiment environment:** We conduct experiments with Python 3.7.13 and Tensorflow 2.9.0 on an Ubuntu 20.04 machine with a NVIDIA A10 GPU.

### A.1 DETAILS OF MOMENTUM REVERSE TRIGGER

**Illustration of the sub-optimal solution:** We illustrate the sub-optimal solution of the optimization problem defined in Equation 5 in Figure 3. Specifically, we use BadNets (Gu et al., 2019) to train a backdoored DRM on MPIIFaceGaze dataset for gaze estimation, where the trigger is a red square, added at the right bottom corner of the input images, as shown in Figure 3(b). Then, we optimize  $G_\theta$  by solving the optimization problem defined in Equation 5. We show the residual map between the benign image and the reversed poisoned image in Figure 3(d). We can see that solving the optimization problem 5 fails to reverse the trigger but adds perturbations to the eyes region that contains the most important features for gaze estimation (Zhang et al., 2017a).

**Technical details:** The idea of momentum reverse trigger is to assign different weights to different regions to balance the attention of the DRM on the image, such that the algorithm can pay attention to all the pixels and search for the trigger that are injected into both important and unimportant regions. To do this, we first generate an *attention map*  $\mathcal{T}(x_i) \in \mathbb{R}^{N_w \times N_h}$  for each input  $x_i$  based on the gradient of  $f$  w.r.t.  $x_i$ . In detail, for each pixel  $x_i[a, b]$ , we obtain the corresponding value  $\mathcal{T}(x_i)[a, b]$  in the attention map by  $\mathcal{T}(x_i)[a, b] = \sum_{c=1}^{N_c} |\partial f / \partial x_i[a, b, c]|$ . Then, we re-scale the attention map to  $[0, 1)$  by dividing each component of the attention map by a number that is larger than the maximum value in the attention map. Then, instead of directly feeding  $G_\theta(x_i)$  to  $f$ , we use the following image as the poisoned image and feed it to the DRM:

$$x'_i = G_\theta(x_i) \odot (1 - \mathcal{T}(x_i)) + x_i \odot \mathcal{T}(x_i). \quad (7)$$

### A.2 DETAILS OF REGRESSION TASKS AND DATASETS

#### A.2.1 DETAILS OF REGRESSION TASKS

We consider two regression tasks, i.e., gaze estimation and head pose estimation. Below, we introduce the details of each regression task.

**Gaze estimation:** We consider 3D full-face gaze estimation, where the gaze estimation model aims to estimate the 3D gaze direction from the facial image. The 3D gaze direction is represented by a two-dimensional vector, denoting the yaw and pitch angles of the gaze direction. Following the existing works on gaze estimation (Zhang et al., 2020; 2017a), we use angular error as the regression error, which is defined as the angle between the estimated and the real gaze directions.

**Head pose estimation:** We consider a head pose estimation model that takes a monocular image input and outputs a three-dimensional vector to denote the Euler angle (yaw, pitch, roll) of head pose (Gupta et al., 2019). We use  $L1$  loss as the regression error.

#### A.2.2 DETAILS OF DATASETS

We consider four benchmark datasets in our evaluation and introduce the details of these datasets in the following. We also introduce the training details of benign DRMs on each dataset.

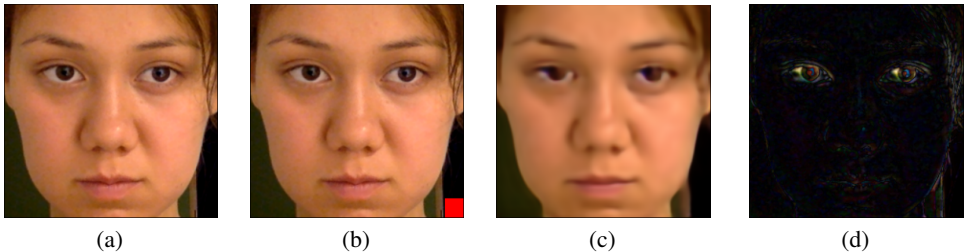

Figure 3: The visualization of the sub-optimal solution: (a) the benign image; (b) the poisoned image; (c) the reversed poisoned image when directly solving the optimization problem defined in Equation 5; and (d) the residual map between the benign and reversed poisoned images. Solving the optimization problem 5 fails to reverse the trigger but adds perturbations to the image region that contains the most important features for gaze estimation.

**MPIIFaceGaze** (Zhang et al., 2019) is a benchmark dataset for gaze estimation and is collected from 15 subjects in their daily life. Each subject contains 3,000 images under different backgrounds, illumination conditions, and head poses. The image resolution is  $224 \times 224$ . We use Adam optimizer with a learning rate of 0.0001 to train the model for 10,000 training steps.

**ColumbiaGaze** (Smith et al., 2013) is a gaze estimation dataset collected from 56 subjects. Each subject has 105 facial images. We crop the facial patches from the original images and resize them to  $224 \times 224$ . We use Adam optimizer with an initial learning rate of 0.001 to train the model for 10,000 training steps. The learning rate is multiplied by 0.1 at 5,000 and 9,000 training steps.

**Biwi Kinect Dataset** (Fanelli et al., 2013) is used for head pose estimation. It is collected from 24 subjects, and each subject has 400 to 900 images. Note that we use the *cropped faces of Biwi dataset (RGB images)* released by (Borghi et al., 2017). We resize the image to  $112 \times 112$ . We use Adam optimizer with a learning rate of 0.0001 to train the model for 5,000 training steps.

**Pandora Dataset** (Borghi et al., 2017) is a dataset for head pose estimation, which includes more than 250k RGB and depth images. We use the pre-processed dataset, *Cropped faces (RGB images)*, released by the authors, where the facial images are cropped from the original images. The pre-processed dataset has 100 subjects, and contains more than 120,000 images. We use Adam optimizer with an initial learning rate of 0.0001 to train the model for 10,000 training steps. The learning rate is multiplied by 0.1 at 5,000 training steps.

### A.3 DETAILS OF BACKDOOR ATTACKS

In this subsection, we describe the details of the backdoor attacks used in our evaluation and how to adapt them to DRMs. We also show the effectiveness of backdoor attacks on DRMs.

**BadNets** (Gu et al., 2019) uses a fixed pattern as the backdoor trigger, and the poisoned inputs are generated by pasting the backdoor trigger on the inputs. In our experiments, we use a  $20 \times 20$  red patch located at the right-bottom corner as the backdoor trigger. The poisoning rate is 5%.

**Clean Label** (Turner et al., 2019) also uses a fixed pattern as the backdoor trigger. To be more stealthy, the trigger is only applied to images that belong to the target class for classification tasks. In our experiments, we use a  $20 \times 20$  red patch located at the right-bottom corner as the backdoor trigger. To generalize Clean Label to regression tasks, we apply the trigger to the inputs whose annotations are "close" to the target vector. Formally, we consider the images whose annotations  $y$  satisfy  $\|y - y_T\| \leq \delta$  as the target group to be poisoned. We apply the PGD attack to half of the images in the target group to generate adversarial samples. To improve the performance of backdoor attacks, we apply the trigger to both the adversarial samples and another half of the images in the target group. This is because if we only apply trigger to the adversarial samples, the trained DRM will regard the perturbations generated by the PGD attack as the backdoor trigger and ignore the attacker-defined trigger pattern. Annotations of poisoned images are changed to the target vector.

**WaNet** (Nguyen & Tran, 2021) generates stealth backdoor triggers through image warping techniques. The trigger is inserted into the images by applying the elastic warping operation. Note that,

WaNet needs to modify the standard training process to train the backdoored DRM, while BadNets and Clean Label follow the standard way to train the backdoored DRM. To improve the performance of the attack, we set the warping strength to 1. We set the grid sizes for gaze estimation datasets and head pose estimation datasets to 28 and 14, respectively.

**Input-aware dynamic attack (IA)** (Nguyen & Tran, 2020) generates dynamic backdoor triggers by using a trainable trigger generator, which takes benign images as inputs and outputs triggers varying from input to input. A trigger generated by an input image cannot be used on another one. Similar to WaNet, IA also needs to modify the training process.

Table 10: Effectiveness of different backdoor attacks on DRMs.

| Metric | BadNets | IA   | Clean Label | WaNet | Benign |
|--------|---------|------|-------------|-------|--------|
| AE     | 3.25    | 3.19 | 0.72        | 1.31  | n/a    |
| RE     | 2.61    | 2.33 | 1.82        | 2.32  | 2.35   |

**Effectiveness of backdoor attacks on DRMs:** We use attack error (AE) to evaluate the effectiveness of backdoor attacks on DRMs. Given a set of poisoned inputs, we define AE as the average regression error calculated from the output vectors and the target vector over all the poisoned inputs. AE can be regarded as the counterpart to the attack success rate for backdoor attacks on deep classification models. Besides, we define RE as the average regression error calculated from the output vectors and the correct annotations over a benign dataset. For each attack, we apply the corresponding trigger function to each image in the benign dataset  $\mathcal{D}_{be}$  to generate a set of poisoned images  $\mathcal{PD}_{te}$ . We report AE over  $\mathcal{PD}_{te}$  and RE over  $\mathcal{D}_{be}$  to show the effectiveness of the above mentioned backdoor attacks on DRMs in Table 10. The experimental results show that the AE of different backdoored DRMs are pretty low, which are almost similar to the RE of these backdoored DRMs. Also, the RE of these backdoored DRMs are similar to that of the benign DRM. This proves the effectiveness of these backdoor attacks on DRMs.

#### A.4 DETAILS OF BASELINE DEFENSES

We generalize two state-of-the-art defenses, i.e., Neural Cleanse (NC) (Wang et al., 2019) and FeatureRE (Wang et al., 2022b), to regression models. Since the output of DRM is defined in the continuous space, we generalize them from classification models to regression models by taking the potential target vector  $y_t$  as the optimization variable. Below, we introduce the formal definitions of the optimization problems for these two defenses after generalization.

**Generalization of NC:** We generalize the optimization problem defined in NC to DRMs as:

$$m^*, \Delta^*, y_t^* = \min_{m, \Delta, y_t} \frac{1}{N} \sum_{i=1}^N \ell(y_t, f(A(x_i, m, \Delta))) + \lambda \cdot |m|, \quad (8)$$

where  $\lambda$  is the weight for the second objective;  $A(\cdot)$  is a function that applies a trigger represented by  $m$  and  $\Delta$  to the benign image  $x$ ; and  $\ell(\cdot)$  is the loss function for training the DRMs. Specifically,  $\ell(\cdot)$  is  $\ell_1$  loss for gaze estimation and head pose estimation. The detailed description of  $A(\cdot)$  can be found in (Wang et al., 2019).

**Generalization of FeatureRE:** We generalize the optimization problem defined in FeatureRE to DRMs as:

$$\theta^*, m^*, y_t^* = \min_{\theta, m, y_t} \ell(H((1-m) \odot a + m \odot t), y_t) + \frac{\lambda_3}{N} \sum_{i=1}^N \|G_\theta(x_i) - x_i\|, \quad (9)$$

$$\text{where } t = \text{mean}(m \odot F(G_\theta(\{x_i\}_{i=1}^N))), a = F(\{x_i\}_{i=1}^N),$$

$$\text{s.t. } \text{std}(m \odot F(G_\theta(\{x_i\}_{i=1}^N))) \leq \tau_1, \|m\| \leq \tau_2,$$

where  $m$  is the feature-space mask;  $\lambda_3$  is the weight for the second objective;  $\tau_1$  and  $\tau_2$  are the thresholds for two constraints, respectively.



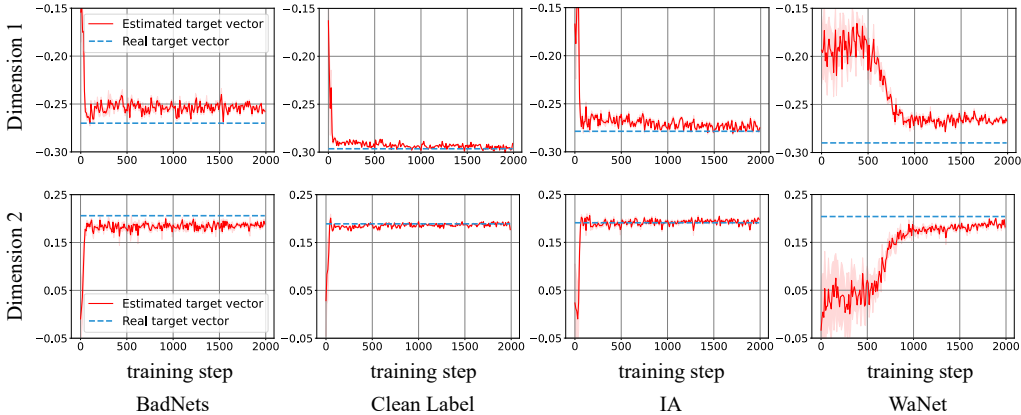

Figure 4: Visualization of the estimation of the target vector (two-dimensional vector) for DRMs backdoored by different attacks on MPIIFaceGaze dataset during the reverse engineering process. The two rows correspond to the first and second dimensions of the output of the DRMs. The red curves denote the estimation of the corresponding dimension of the target vector, while the blue curves denote that of the real target vector. The red curves can converge to the neighbor of the blue curves, which means that DRMGUARD can estimate the target vector.

#### A.5 ESTIMATION OF THE TARGET VECTOR

DRMGUARD is able to estimate the target vector. Given a set of reversed poisoned images, we use the mean vector of the corresponding output vectors as the estimation of the target vector. We visualize the estimation of the target vector during the reverse engineering process for different backdoor attacks, i.e., BadNets, Clean Label, IA, and WaNet, on MPIIFaceGaze dataset in Figure 4. Note that, since it is infeasible to train a backdoored DRM  $f$  that precisely outputs the attacker-chosen target vector for poisoned images, we use the vector,  $\mathbb{E}_{x \in \mathcal{D}_{be}} f(\mathcal{A}(x))$ , as the *real target vector*, where  $\mathbb{E}(\cdot)$  is a function to obtain the mean vector for a given set of vectors. Figure 4 shows that the output vectors of the reversed poisoned images can converge to the neighbor of the real target vector.

#### A.6 VISUALIZATION OF REVERSED POISONED IMAGES

To investigate if DRMGUARD can reverse engineer the poisoned images, we show the benign images, the original poisoned images generated by different backdoor attacks, and the reversed poisoned images in Figure 5. Specifically, we randomly sample six benign images from the benign dataset  $\mathcal{D}_{be}$  and show them in Figure 5(a). We then show the original poisoned images generated by BadNets, Clean Label, IA, and WaNet, on MPIIFaceGaze dataset and the corresponding reversed poisoned images in Figure 5(b), Figure 5(c), Figure 5(d), and Figure 5(e), respectively. DRMGUARD is able to reverse engineer the poisoned images that are close to the original poisoned images.

#### A.7 MULTI-TARGET ATTACK

We consider the scenario that the DRM is backdoored by multiple trigger functions with different target vectors. We generalize WaNet such that it can insert two warping-based triggers into a DRM. Specifically, we generate two different warping functions, and each of them corresponds to a unique target vector. During the training process, we randomly select 15% images in the minibatch to apply the first warping function and change their annotations to the corresponding target vector. We then select another 15% images in the minibatch to apply the second warping function and change their annotations to the corresponding target vector. We do not modify other procedures of WaNet. We call the generalized WaNet *multi-target WaNet*. We train ten backdoored DRMs by using multi-target WaNet and ten benign DRMs on MPIIFaceGaze dataset. We report the performance of backdoor identification of DRMGUARD in this scenario in Table 11, which shows that our method is effective on identifying DRMs with multiple backdoors.

Table 11: Backdoor identification performance of DRMGUARD for multi-target WaNet.

| TP | FP | FN | TN | Acc |
|----|----|----|----|-----|
| 10 | 1  | 0  | 9  | 95% |

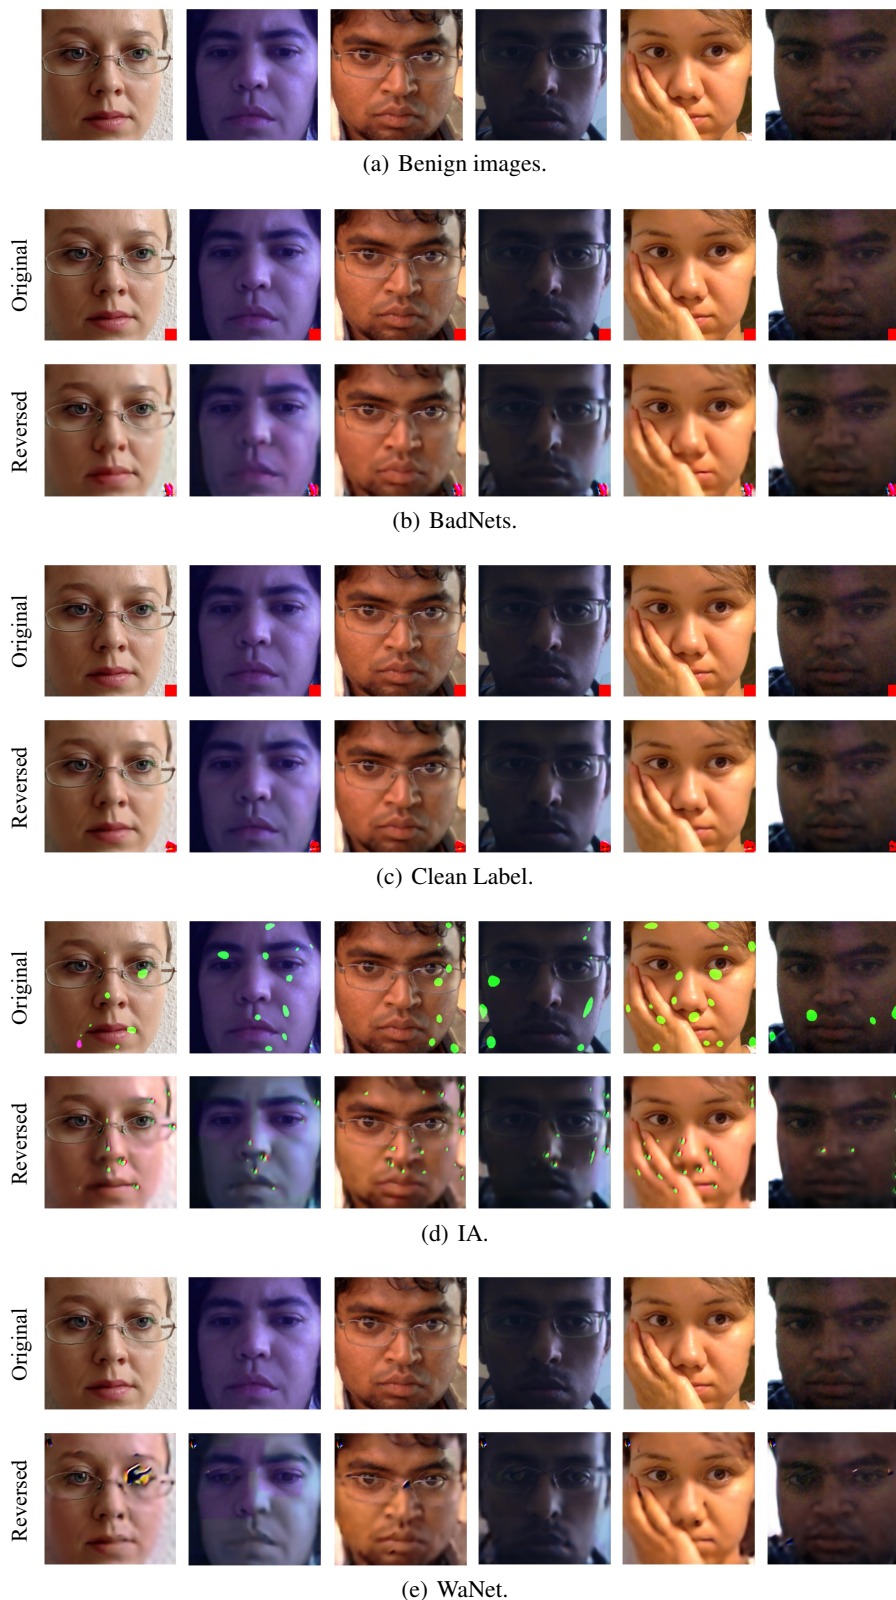

Figure 5: Comparison between (a) the benign images, and the original poisoned images and the corresponding reversed poisoned images for (b) BadNets, (c) Clean Label, (d) IA, and (e) WaNet. The reversed poisoned images are close to the original poisoned images.

Table 12: Backdoor identification performance of DRMGuard for different architectures.

| Architecture | TP | FP | FN | TN | Acc  |
|--------------|----|----|----|----|------|
| ResNet18     | 10 | 1  | 0  | 9  | 95%  |
| ResNet34     | 10 | 0  | 0  | 10 | 100% |
| MobileNetV1  | 7  | 0  | 3  | 10 | 85%  |

Table 14: Backdoor identification performance of DRMGuard on more attacks.

| Attack | TP | FP | FN | TN | Acc |
|--------|----|----|----|----|-----|
| Blend  | 10 | 1  | 0  | 9  | 95% |
| SIG    | 10 | 1  | 0  | 9  | 95% |

Table 13: Backdoor mitigation performance of DRMGuard for different architectures.

| Architecture | Undefended |       | DRMGuard |      |
|--------------|------------|-------|----------|------|
|              | AE         | DAE   | AE       | DAE  |
| ResNet18     | 1.31       | 15.90 | 15.36    | 3.29 |
| ResNet34     | 2.82       | 15.97 | 15.50    | 2.40 |
| MobileNetV1  | 0.42       | 16.04 | 15.88    | 3.70 |

Table 15: Backdoor mitigation performance of DRMGuard on more attacks.

| Attacks | Undefended |       | DRMGuard |      |
|---------|------------|-------|----------|------|
|         | AE         | DAE   | AE       | DAE  |
| Blend   | 2.94       | 14.51 | 12.82    | 4.56 |
| SIG     | 1.83       | 15.96 | 16.11    | 2.93 |

## A.8 MORE EXPERIMENTS

**Evaluation on more architectures:** We study the generalization ability of DRMGuard on different architectures of DRMs. Specifically, beyond ResNet18, we consider two different architectures, i.e., ResNet34 (He et al., 2016) and MobileNetV1 (Howard et al., 2017). For each architecture, we train ten backdoored DRMs by WaNet and ten benign DRMs on MPIIFaceGaze dataset. We report backdoor identification performance and backdoor mitigation performance for different architectures in Table 12 and Table 13, respectively. The results show that DRMGuard can be generalized to different architectures of DRMs.

**Evaluation on more attacks:** We further evaluate the performance of DRMGuard on defending Blend attack (Barni et al., 2019) and SIG (Liu et al., 2020). For each attack, we train ten backdoored DRMs by WaNet and ten benign DRMs on MPIIFaceGaze dataset. We report backdoor identification performance in Table 14. We also report backdoor mitigation performance in Table 15. The experimental results show that DRMGuard can consistently defend against various attacks.

**Evaluation on a larger set of DRMs:** We evaluate the backdoor identification performance of DRMGuard on a larger set of DRMs. Specifically, we train 30 backdoored DRMs by WaNet and 30 benign DRMs on MPIIFaceGaze dataset. We report backdoor identification performance in Table 16. The results show DRMGuard can reach the identification accuracy at 90% on a larger set of DRMs.

Table 16: Backdoor identification performance of DRMGuard on a larger set of DRMs.

| TP | FP | FN | TN | Acc |
|----|----|----|----|-----|
| 29 | 5  | 1  | 25 | 90% |

## A.9 GENERALIZATION TO CLASSIFICATION DOMAIN

We show that the idea of *minimizing the variance in the output space* can be extended to DCMs. By doing so, we can identify backdoored DCMs without enumerating all the labels.

We use  $\{S(C(A(x_i)))\}_{i=1}^N$  to denote the probability vectors obtained by a backdoored DCM  $C(\cdot)$  from a set of poisoned images  $\{A(x_i)\}_{i=1}^N$ , where  $S(\cdot)$  is the softmax function. Intuitively, the poisoned images will lead to similar probability vectors for a backdoored DCM. Therefore,  $\frac{1}{d} \sum_{j=1}^d \sigma^2(\{S_j(C(A(x_i)))\}_{i=1}^N)$  will be a small positive value, where  $S_j(C(A(x_i)))$  is the  $j$ th component of  $S(C(A(x_i)))$ . Based on this intuition, we propose the following optimization objective to generalize DRMGuard from the regression domain to the classification domain.

$$\theta^* = \min_{\theta} \frac{\lambda_1}{d} \sum_{j=1}^d \sigma^2(\{S_j(f(G_{\theta}(x_i)))\}_{i=1}^N) + \frac{1}{N} \sum_{i=1}^N \|G_{\theta}(x_i) - x_i\|_1 \quad (10)$$

The first objective in the optimization problem aims to reverse engineer the poisoned images  $\{G_{\theta}(x_i)\}_{i=1}^N$  that lead to the similar probability vectors, regardless of their actual contents. The second optimization term ensures the transformed images  $G_{\theta}(x_i)$  is similar to original image  $x_i$ . We remove the feature-

Table 17: Backdoor identification performance for DCMs.

| TP | FP | FN | TN | Acc |
|----|----|----|----|-----|
| 7  | 0  | 3  | 10 | 85% |

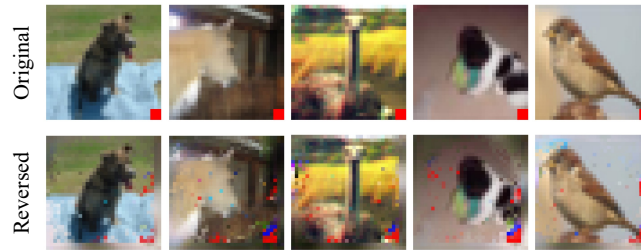

Figure 6: Illustration of original poisoned images (the first row) and reversed poisoned image (the second row) for backdoored DCMs,

space regularization term designed for DRMs, since backdoored DRMs and backdoored DCMs have different feature-space characteristics.

We train ten backdoored DCMs by BadNets and ten benign DCMs on Cifar10. We report backdoor identification results in the Table 17. We visualize the reversed poisoned image in Figure 6. The results show that our idea of minimizing the variance in the output space can be extended to the classification domain for backdoor identification without enumerating all the labels.

#### A.10 TECHNICAL DETAILS OF DRMGUARD

We use a simple generative model to implement  $G_\theta$ , which is similar to the generative model used in (Nguyen & Tran, 2020). Before performing the reverse engineering, we pre-train  $G_\theta$  on the benign dataset for 5,000 training steps. During the reverse engineering, the batch size for gaze estimation datasets is 50, while that for head pose estimation datasets is 100. We use Adam optimizer to train  $G_\theta$  for 2,000 training steps, taking about 16 minutes. The learning rates for gaze estimation and head pose estimation are 0.0015 and 0.0001, respectively.
